# Supplementary material
Source: HighWire-hosted journal article supplement (https://bmjopen.bmj.com/content/12/2/e048146)
Supplement: inline-supplementary-material-1 [file inline-supplementary-material-1.pdf]

## Supplementary file 1. Examples of US Option Grid decision aids and Dutch 'Consultkaarten'

US Option Grids decision aids are available through:

<https://www.ebsco.com/health-care/products/my-health-decisions>

Dutch Consultkaarten are available through:

<https://consultkaart.nl/consultkaart-zoeken/>

Format of ePDAs we used in our study:

### Encounter patient decision aid for [disease X]

|                                                                                      | <b>Care option 1</b><br>For example:<br>Conservative treatment | <b>Care option 2</b><br>For example:<br>Medication | <b>Care option 3</b><br>For example:<br>Surgery |
|--------------------------------------------------------------------------------------|----------------------------------------------------------------|----------------------------------------------------|-------------------------------------------------|
| <b>FAQ 1</b><br>for example: what are advantages and disadvantages of this treatment | Answers                                                        | Answers                                            | Etc.                                            |
| <b>FAQ 2</b>                                                                         |                                                                |                                                    |                                                 |
| <b>FAQ 3</b>                                                                         |                                                                |                                                    |                                                 |
| <b>FAQ 4</b>                                                                         |                                                                |                                                    |                                                 |
