# Supplementary material
Source: HighWire-hosted journal article supplement (https://bmjopen.bmj.com/content/12/2/e048146)
Supplement: inline-supplementary-material-2 [file inline-supplementary-material-2.pdf]

## Supplementary file 2. Encounter patient decision aids used in this study

| <i>Dutch ePDAs (“Consultkaarten”) - Netherlands</i>                                                                                                                                                                                                                                                                                                                                                                                                                                                                                                                                                                                                                                                                                                                                                                                        | American ePDAs (“Option Grids decision aids”) - Dartmouth                                                                              |
|--------------------------------------------------------------------------------------------------------------------------------------------------------------------------------------------------------------------------------------------------------------------------------------------------------------------------------------------------------------------------------------------------------------------------------------------------------------------------------------------------------------------------------------------------------------------------------------------------------------------------------------------------------------------------------------------------------------------------------------------------------------------------------------------------------------------------------------------|----------------------------------------------------------------------------------------------------------------------------------------|
| <p><i>Gynecologists</i></p> <ol style="list-style-type: none"> <li>1. adult women with heavy menstrual bleeding (treatment options)*</li> <li>2. adult women with heavy menstrual bleeding (surgical options)*</li> </ol> <p><i>ENT-specialists:</i></p> <ol style="list-style-type: none"> <li>3. children with tonsillitis</li> <li>4. children with otitis media</li> </ol> <p><i>Neurologists</i></p> <ol style="list-style-type: none"> <li>5. adults with epilepsy – treatment options</li> <li>6. adults with epilepsy – partial attacks: options for medication</li> <li>7. adults with difficult-to-treat epilepsy – treatment options</li> </ol> <p><i>Orthopaedic surgeon</i></p> <ol style="list-style-type: none"> <li>8. adults with osteoarthritis of the hip</li> <li>9. adults with osteoarthritis of the knee</li> </ol> | <p><i>Gynecologists</i></p> <ol style="list-style-type: none"> <li>1. Heavy menstrual bleeding</li> <li>2. Uterine fibroids</li> </ol> |

\*after data collection, these ePDAs were updated and merged into one ePDA about [heavy menstrual bleeding](#).
