# Supplementary material
Source: HighWire-hosted journal article supplement (https://bmjopen.bmj.com/content/12/2/e048146)
Supplement: inline-supplementary-material-4 [file inline-supplementary-material-4.pdf]

## Supplementary file 4. Codes related to the categories and themes

| Concept: impact of the ePDAs on the patient-clinician dialogue |                                        |                                                                                          |
|----------------------------------------------------------------|----------------------------------------|------------------------------------------------------------------------------------------|
| Theme                                                          | Categories                             | Code                                                                                     |
| Communication style                                            | -                                      | structuring conversation and information provision                                       |
|                                                                |                                        | deepens conversation                                                                     |
| SDM                                                            | Impact on decision-making              | ePDA helps patient make decision                                                         |
|                                                                |                                        | ePDA did not influence decision                                                          |
|                                                                |                                        | difficult to say whether it influenced decision making                                   |
|                                                                |                                        | ePDA changed decision making process of patients                                         |
|                                                                |                                        | supports patients also in future choices or switching options                            |
|                                                                |                                        | enhances value clarification                                                             |
|                                                                | Willingness of patients to be involved | not all patients want to use ePDA or be involved in SDM                                  |
| Workflow                                                       | Change in workflow needed              | ePDA works better when clinician is more familiar with it                                |
|                                                                |                                        | change of workflow                                                                       |
|                                                                |                                        | cope with options inappropriate for patient                                              |
|                                                                |                                        | fitting applicability of tool in existing workflow                                       |
|                                                                |                                        | colleagues will feel resistance to change their conversation flow with patients (belief) |
|                                                                |                                        | discuss ePDA with patient                                                                |
|                                                                | Time-investment                        | time investment to use ePDA in clinical practice<br>in salaried employment               |
| Clinician's role                                               | Discuss more information               | enables clinician to put more focus on preferred treatment of patient                    |
|                                                                |                                        | supports clinician in educating patient and SDM                                          |
|                                                                |                                        | prompted clinician to discuss more information                                           |
|                                                                | Customize ePDA                         | clinician felt more confident to have covered all options                                |
|                                                                |                                        | customize ePDA to options appropriate for patients                                       |
|                                                                | -                                      | we're already doing a good job [without ePDA]                                            |
| Patient's role                                                 | Patient behavior changed               | more trust in conversation                                                               |
|                                                                |                                        | prepares patient for counselling by clinician                                            |
|                                                                |                                        | patient focused on ePDA not listening well anymore                                       |
|                                                                |                                        | feel more engaged, taken seriously                                                       |
|                                                                |                                        | tell their thoughts and concerns                                                         |
|                                                                |                                        | structures thinking process                                                              |
|                                                                |                                        | more realistic expectations                                                              |
|                                                                |                                        | liked the tool                                                                           |
| gives agency for decisions to be made                          |                                        |                                                                                          |

| Concept: impact of the ePDAs on the patient-clinician dialogue |                  |                                                                        |
|----------------------------------------------------------------|------------------|------------------------------------------------------------------------|
| Theme                                                          | Categories       | Code                                                                   |
|                                                                |                  | enhances therapy compliance                                            |
|                                                                |                  | prompted patient to ask more questions                                 |
|                                                                |                  | involves partner into encounter                                        |
|                                                                | Suitability      | better for higher education                                            |
|                                                                |                  | for all patients with problem applicable to ePDA                       |
|                                                                |                  | when there's a preference-sensitive decision to be made                |
|                                                                |                  | ePDA works better for some patients than for others                    |
|                                                                |                  | helpful for patients that need visuals                                 |
|                                                                |                  | with patients who arrive knowing what they want                        |
|                                                                |                  | for illiterate, mentally handicapped or patients with language barrier |
| for patients that need certain type of procedure               |                  |                                                                        |
| Content of ePDA                                                | Positive factors | clear                                                                  |
|                                                                |                  | complete                                                               |
|                                                                |                  | reliable context, more neutral compared to clinician telling it        |
|                                                                |                  | insight in available options                                           |
|                                                                |                  | nice to have as reference                                              |
|                                                                | Negative factors | amount of information might overwhelm patients                         |
|                                                                |                  | too much information to cover in encounter                             |
|                                                                |                  | not adapted to local context                                           |
|                                                                |                  | answers not complete vs. not all information is important to know      |
|                                                                |                  | percentages of complications bring patients in doubt                   |
